# Supplementary material for: Fast Silencing Reveals a Lost Role for Reciprocal Inhibition in Locomotion
Source: PubMed Central journal article supplement (PMC3542422; doi:10.1016/j.neuron.2012.10.040), 2013-01-09
Supplement: mmc1.pdf [file mmc1.pdf]

**Neuron, Volume 77**

**Supplemental Information**

**Fast Silencing Reveals a Lost Role  
for Reciprocal Inhibition in Locomotion**

**Peter R. Moulton, Glen Cottrell, and Wen-Chang Li**

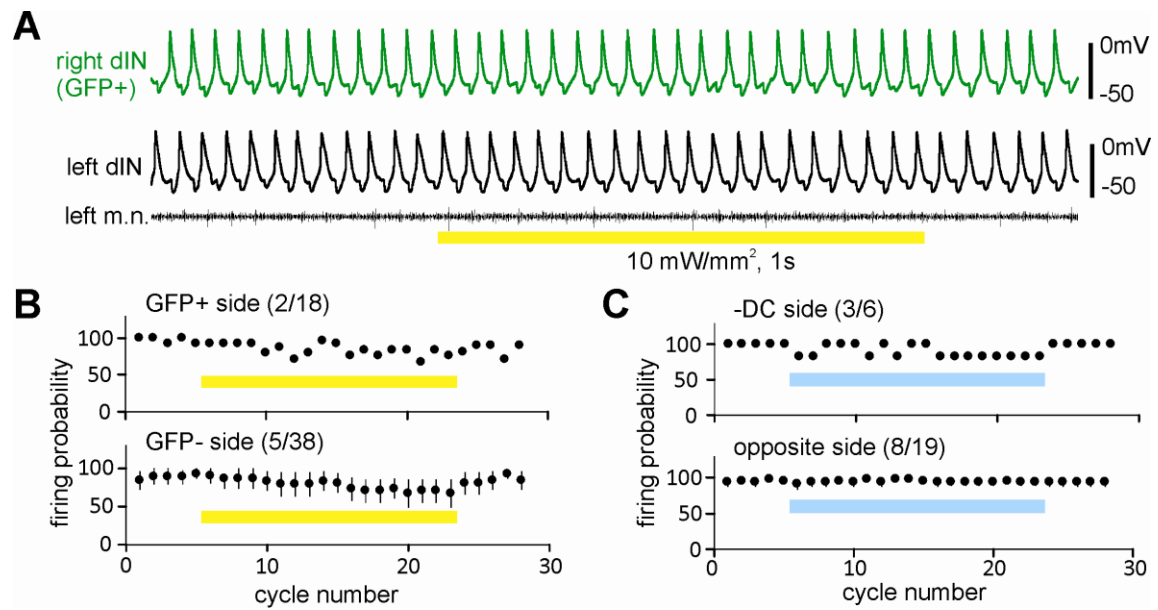

**Figure S1. Cycle-by-cycle neuronal firing probability did not drop significantly in trials where one-sided silencing failed to stop swimming.** (A) An example trial when light failed to decrease neuronal firing probability (right and left dIN) and stop swimming (left m.n.).

Note the reliable mid-cycle inhibition in both dINs. (B) Neuronal firing probability in light illumination experiments. Yellow bars indicate 1 second period of illumination. (C) Firing probability in -DC injection experiments. Blue bars indicate 1 second of current injections. Numerals in brackets are number of cells/trials, respectively. Vertical bars are standard errors. Cycle-by-cycle firing probability was first calculated for each cell and then averaged. One second period of one-sided silencing lasted for 18-21 cycles and only the first 17 cycles were used for averaging.

The continuous neuronal firing/swimming during silencing period means that reciprocal inhibition was not significantly suppressed as expected in these cases. Comparing probability in the last 5 cycles during silencing with control revealed no significance in all cases (GFP+ side and -DC side data pooled together,  $p > 0.05$ , Wilcoxon Signed Rank test in each case).
